# Supplementary material for: Neuroprotective Effect of Bcl-2 on Lipopolysaccharide-Induced Neuroinflammation in Cortical Neural Stem Cells
Source: MDPI journal article supplement (doi:10.3390/ijms23126399), 2022-06-07
Supplement: s1 [file s1]

## **Supplementary Information**

### **Neuroprotective effect of Bcl-2 on lipopolysaccharide-induced neuroinflammation in cortical neural stem cells**

Shin-Young Park and Joong-Soo Han

Biomedical Research Institute and Department of Biochemistry and Molecular Biology, College of Medicine, Hanyang University, 222 Wangsimni-ro, Seongdong-gu, Seoul 04763, Republic of Korea.

#### Co-correspondence

Shin-Young Park. Tel.: 82-2-2220-0610; Fax: 82-2-2220-2422; E-mail: [ttokttoki@hanyang.ac.kr](mailto:ttokttoki@hanyang.ac.kr)

Joong-Soo Han. Tel.: 82-2-2220-0623; Fax: 82-2-2220-2422; E-mail: [jshan@hanyang.ac.kr](mailto:jshan@hanyang.ac.kr)

## Supplementary Figure S1

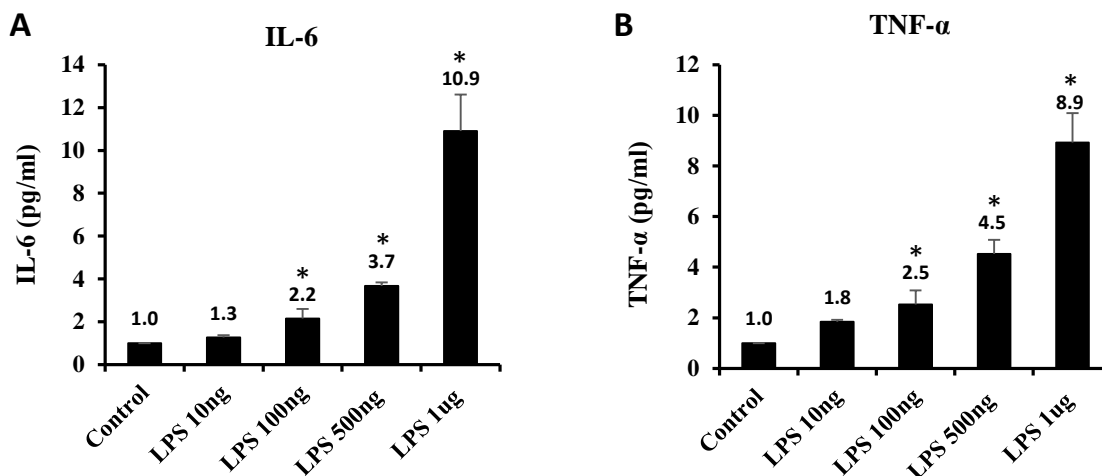

**Supplementary Figure S1.** Pro-inflammatory cytokine production in LPS-treated NSCs. (A and B) NSCs were treated with LPS at 10 ng, 100 ng, 500 ng, or 1  $\mu$ g/mL for 12 h in the absence of bFGF. The mRNA levels of *IL-6* and *TNF- $\alpha$*  were analyzed by real-time RT-PCR;  $n = 3$ . Data are shown as mean  $\pm$  SD. \*  $p < 0.05$  compared with control, for *IL-6* and *TNF- $\alpha$*  respectively. Statistical significances were assessed by one-way ANOVA with a post hoc Tukey's test.

## Supplementary Figure S2

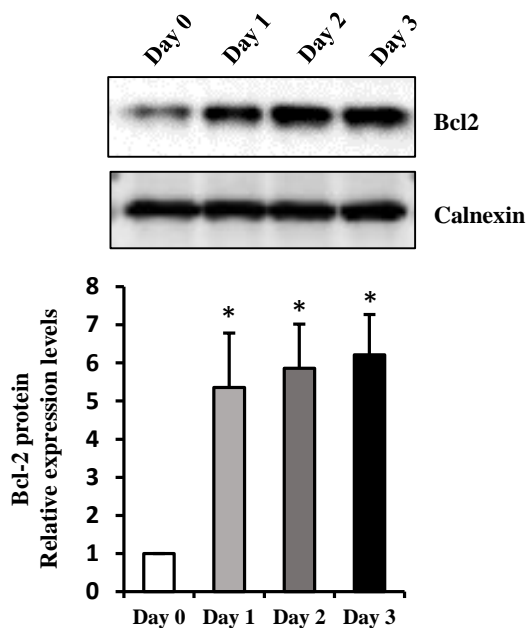

**Supplementary Figure S2. Bcl-2 expression during neuronal differentiation in NSCs.** NSCs were differentiated for 1, 2 or 3 days in the absence of bFGF, respectively. Western blotting was performed using anti-Bcl-2 or anti-calnexin antibodies to detect the respective protein bands (upper panel). Band intensity (graph) was quantified with Quantity Ones® software. Data are shown as mean  $\pm$  SD. \*  $p < 0.05$  compared with Day 0. Statistical significances were assessed by one-way ANOVA with a post hoc Tukey's test.
